# Supplementary material for: The Neuroprotective Effect of Shenmai Injection on Oxidative Stress Injury in PC12 Cells Based on Network Pharmacology
Source: Hindawi journal article supplement (doi:10.1155/2022/6969740), 2022-05-27
Supplement: f1 [file 6969740.f1.zip]

## **SMI & AIS**

VDR  
HMGCR  
MMP2  
KDR  
ABCG2  
NOS2  
SLC6A4  
MMP3  
FGFR1  
PPARA  
ALOX5  
BACE1  
CYP2C19  
EGFR  
NQO1  
PIK3CA  
FLT3  
TSP0  
ADORA1  
ALDH2  
IL2  
SYK  
FOS  
G6PD  
PDE5A  
MAPK8  
ADORA2A  
EDNRA  
F2R  
TNNT3  
BCL2L1  
ADORA3  
ABL1  
PPARG  
CHEK2  
ANPEP  
CFTR  
SRC  
ABCB1  
NR3C1  
MTOR  
SERPINE1  
MAPK14  
TNF  
CCR2  
JAK1

KIT  
AKT1  
JAK2  
NR1H2  
STAT3  
TNNT2  
PTGS2  
MIF  
SIRT1  
ABCC1  
TGFBR1  
CYP2C9  
REN  
CCND1  
ESR1  
CDK4  
AGTR1  
PTGS1  
F3  
PDE4D  
PSEN1  
MME  
JUN  
BRAF  
ACHE  
MMP1  
ADA  
CYP3A4  
ITGAL  
MMP9  
PARP1
