# Supplementary material for: The Neuroprotective Effect of Shenmai Injection on Oxidative Stress Injury in PC12 Cells Based on Network Pharmacology
Source: Hindawi journal article supplement (doi:10.1155/2022/6969740), 2022-05-27
Supplement: f1 [file 6969740.f1.zip]

| OMIM     | GeneCards, 10 | OMIM+GeneCards |
|----------|---------------|----------------|
| GNB1     | F2            | GNB1           |
| TAL1     | F5            | TAL1           |
| CPT2     | NOTCH3        | CPT2           |
| AIR      | NOS3          | AIR            |
| RBM15    | TP53          | RBM15          |
| F5       | JAK2          | F5             |
| LPIN1    | CEBPA         | LPIN1          |
| DNMT3A   | MT-TL1        | DNMT3A         |
| HADHA    | RUNX1         | HADHA          |
| RANBP2   | ACE           | RANBP2         |
| GATA2    | IL6           | GATA2          |
| DBR1     | MTHFR         | DBR1           |
| MME      | FBN1          | MME            |
| LPP      | ALOX5AP       | LPP            |
| CHIC2    | CRP           | CHIC2          |
| KIT      | TNF           | KIT            |
| RAP1GDS1 | LDLR          | RAP1GDS1       |
| TERT     | KIT           | TERT           |
| STRK1    | PIK3CA        | STRK1          |
| ACSL6    | PRKCH         | ACSL6          |
| IRF1     | GP1BA         | IRF1           |
| NPM1     | KMT2A         | NPM1           |
| DEK      | TET2          | DEK            |
| MYB      | KRAS          | MYB            |
| ALL2     | HMBS          | ALL2           |
| NOS3     | IL1B          | NOS3           |
| BLACE    | ENG           | BLACE          |
| STAR     | DNMT3A        | STAR           |
| NBN      | APOE          | NBN            |
| BAALC    | INSL6         | BAALC          |
| JAK2     | TERT          | JAK2           |
| LALL     | GATA2         | LALL           |
| PAX5     | IL10          | PAX5           |
| TAL2     | ACSL4         | TAL2           |
| ALAD     | STAT3         | ALAD           |
| SET      | NSD1          | SET            |
| NUP214   | MT-ND1        | NUP214         |
| AF10     | PLAT          | AF10           |
| ALL1     | SERPINE1      | ALL1           |
| LM01     | MIR126        | LM01           |
| LM02     | COL4A1        | LM02           |
| F2       | IDH1          | F2             |
| UNC93B1  | MMP9          | UNC93B1        |
| NUMA1    | MIR155        | NUMA1          |
| PICALM   | ACTB          | PICALM         |
| ZBTB16   | NPPB          | ZBTB16         |

|         |          |         |
|---------|----------|---------|
| HMBS    | CDKN2A   | HMBS    |
| ETV6    | ADAMTS13 | ETV6    |
| KRAS    | GATA1    | KRAS    |
| TBK1    | MT-ND5   | TBK1    |
| ALDH2   | SELP     | ALDH2   |
| FLT3    | VEGFA    | FLT3    |
| ALOX5AP | MYH11    | ALOX5AP |
| SNORA31 | NPPA     | SNORA31 |
| TRAF3   | IDH2     | TRAF3   |
| PML     | AGTR1    | PML     |
| MEFV    | SERPINC1 | MEFV    |
| CREBBP  | PICALM   | CREBBP  |
| MYH11   | ALB      | MYH11   |
| CBFB    | THBD     | CBFB    |
| GP1BA   | ABL1     | GP1BA   |
| RARA    | PML      | RARA    |
| STAT5B  | PTEN     | STAT5B  |
| STAT3   | CST3     | STAT3   |
| ACE     | ADA2     | ACE     |
| SH3GL1  | TLR4     | SH3GL1  |
| TICAM1  | MT-ND4   | TICAM1  |
| LYL1    | VWF      | LYL1    |
| CEBPA   | GNB1     | CEBPA   |
| BAX     | MT-CO1   | BAX     |
| IRF3    | MT-ND6   | IRF3    |
| SLC13A3 | F3       | SLC13A3 |
| RUNX1   | AGT      | RUNX1   |
| BCR     | CXCL8    | BCR     |
| I IAE3  | MPL      | I IAE3  |
| IMD21   | STAT5B   | IMD21   |
| NEP     | MT-ATP6  | NEP     |
| DKCA2   | MIR223   | DKCA2   |
| CAIN    | THPO     | CAIN    |
| TTG2    | CASP3    | TTG2    |
| LAP     | PDE4D    | LAP     |
| NS      | SERPINA3 | NS      |
| I IAE8  | MPO      | I IAE8  |
| CAP1    | LPIN1    | CAP1    |
| PAAND   | ITGB3    | PAAND   |
| MKHK1   | CXCL12   | MKHK1   |
| VSCM2   | PON1     | VSCM2   |
| VWDP    | MIR210   | VWDP    |
| ADMI01  | CCL2     | ADMI01  |
| MVCD3   | CPT2     | MVCD3   |
| ALL     | ICAM1    | ALL     |
| MDS     | ACTA2    | MDS     |
| SCL     | BCR      | SCL     |

|         |            |         |
|---------|------------|---------|
| OTT     | CSF3       | OTT     |
| RPRGL1  | BRCA2      | RPRGL1  |
| HESJAS  | GLA        | HESJAS  |
| ANE1    | MT-CO3     | ANE1    |
| MONOMAC | IL4        | MONOMAC |
| CALLA   | RTEL1      | CALLA   |
| MASTC   | BDNF       | MASTC   |
| EST2    | INS        | EST2    |
| ACS2    | APOH       | ACS2    |
| ALL3    | ELN        | ALL3    |
| PBGS    | REN        | PBGS    |
| CAN     | BAX        | CAN     |
| RHOM1   | ABCB1      | RHOM1   |
| RHOM2   | HTRA1      | RHOM2   |
| RPRGL2  | APOB       | RPRGL2  |
| CLTH    | FGA        | CLTH    |
| PLZF    | IL1RN      | PLZF    |
| UPS     | EDN1       | UPS     |
| THC5    | CALR       | THC5    |
| RASK2   | HIF1A      | RASK2   |
| FTDALS4 | MEFV       | FTDALS4 |
| LAP1    | NOTCH1     | LAP1    |
| FMF     | AKT1       | FMF     |
| RSTS1   | HP         | RSTS1   |
| FAA4    | HLA-DRB1   | FAA4    |
| BDPLT1  | ELANE      | BDPLT1  |
| HIES    | MYC        | HIES    |
| ACE1    | CSF2       | ACE1    |
| IIAE6   | F7         | IIAE6   |
| ARLIAK  | PLG        | ARLIAK  |
| AML1    | LPA        | AML1    |
| PHL     | CDKN2B-AS1 | PHL     |
| MRD42   | MIR320A    | MRD42   |
| TCL5    | LMNA       | TCL5    |
| IIAE4   | PLA2G7     | IIAE4   |
| SPEN    | IFNG       | SPEN    |
| THPH2   | LPL        | THPH2   |
| TBR5    | MT-CO2     | TBR5    |
| MTPA    | CXCR4      | MTPA    |
| NUP358  | MB         | NUP358  |
| DCML    | SETD2      | DCML    |
| CD10    | ANXA5      | CD10    |
| BTL     | ALOX5      | BTL     |
| PBT     | HLA-B      | PBT     |
| TCS1    | APP        | TCS1    |
| FACL6   | MAPT       | FACL6   |
| MAR     | RNF213     | MAR     |

|         |         |         |
|---------|---------|---------|
| D6S231E | TTR     | D6S231E |
| NBS1    | PIK3C2A | NBS1    |
| THCYT3  | SELE    | THCYT3  |
| BSAP    | PTPN11  | BSAP    |
| ALADH   | FIP1L1  | ALADH   |
| MRD58   | CYCS    | MRD58   |
| D9S46E  | CDKN2B  | D9S46E  |
| RBTN1   | ALDH2   | RBTN1   |
| RBTN1   | WT1     | RBTN1   |
| THPH1   | PTGS2   | THPH1   |
| I IAE1  | EPO     | I IAE1  |
| CALM    | EPOR    | CALM    |
| ZNF145  | COL4A2  | ZNF145  |
| PBGD    | IL18    | PBGD    |
| TEL     | CREB1   | TEL     |
| KRAS2   | LOX     | KRAS2   |
| NAK     | TGFB1   | NAK     |
| FLAP    | PECAM1  | FLAP    |
| CD40BP  | GUCY1A1 | CD40BP  |
| MYL     | TLR3    | MYL     |
| MEF     | SMAD4   | MEF     |
| CBP     | ADORA2A | CBP     |
| AAT4    | IL2     | AAT4    |
| PEBP2B  | ADM     | PEBP2B  |
| BSS     | CREBBP  | BSS     |
| GHISID2 | LCN2    | GHISID2 |
| APRF    | G6PD    | APRF    |
| DCP1    | ITGA2B  | DCP1    |
| EEN     | ESR1    | EEN     |
| TRIF    | SOD2    | TRIF    |
| CEBP    | VHL     | CEBP    |
| I IAE7  | PPARG   | I IAE7  |
| NADC3   | IL3     | NADC3   |
| CBFA2   | PF4     | CBFA2   |
| CML     | SH2B3   | CML     |
| CMM9    | PTGIS   | CMM9    |
| OES     | TGFB2   | OES     |
| SCA43   | ATM     | SCA43   |
| PFBMFT1 | P2RY12  | PFBMFT1 |
| RALD    | MYLK    | RALD    |
| I IAE5  | ADIPOQ  | I IAE5  |
| CMT2T   | HFE     | CMT2T   |
| DKCB4   | EDNRA   | DKCB4   |
| I IAE9  | C3      | I IAE9  |
| CFC2    | PBX1    | CFC2    |
| CRAF1   | OLR1    | CRAF1   |
| BDPLT3  | ENO2    | BDPLT3  |

|     |          |          |
|-----|----------|----------|
| ICH | PRKAR1A  | ICH      |
|     | HBB      | NOTCH3   |
|     | CSF3R    | TP53     |
|     | SERPINF2 | MT-TL1   |
|     | CD14     | IL6      |
|     | PRKG1    | MTHFR    |
|     | ADRB2    | FBN1     |
|     | AVP      | CRP      |
|     | TNNI3    | TNF      |
|     | HMGB1    | LDLR     |
|     | CD34     | PIK3CA   |
|     | MIR15A   | PRKCH    |
|     | PDGFRA   | KMT2A    |
|     | TNNT2    | TET2     |
|     | GPT      | IL1B     |
|     | VCAM1    | ENG      |
|     | MT-CYB   | APOE     |
|     | NF1      | INSL6    |
|     | GSTM1    | IL10     |
|     | IL17A    | ACSL4    |
|     | MALAT1   | NSD1     |
|     | MAPK3    | MT-ND1   |
|     | HMGCR    | PLAT     |
|     | CD40LG   | SERPINE1 |
|     | CFH      | MIR126   |
|     | PON2     | COL4A1   |
|     | ANGPT1   | IDH1     |
|     | CYP2C19  | MMP9     |
|     | TNFRSF1A | MIR155   |
|     | APOA1    | ACTB     |
|     | VKORC1   | NPPB     |
|     | U2AF1    | CDKN2A   |
|     | AQP4     | ADAMTS13 |
|     | CTLA4    | GATA1    |
|     | F10      | MT-ND5   |
|     | CCL3     | SELP     |
|     | MDM2     | VEGFA    |
|     | MIR16-1  | NPPA     |
|     | SEPTIN9  | IDH2     |
|     | MIR21    | AGTR1    |
|     | MBP      | SERPINC1 |
|     | SIRT1    | ALB      |
|     | FGB      | THBD     |
|     | CCND1    | ABL1     |
|     | HMOX1    | PTEN     |
|     | COL3A1   | CST3     |
|     | IGF1     | ADA2     |

|         |          |
|---------|----------|
| KNG1    | TLR4     |
| IL1A    | MT-ND4   |
| SMAD3   | VWF      |
| GATA3   | MT-CO1   |
| CASP1   | MT-ND6   |
| CASP9   | F3       |
| BCL2    | AGT      |
| HRAS    | CXCL8    |
| CCR5    | MPL      |
| LTA     | MT-ATP6  |
| SOD1    | MIR223   |
| TRAF3   | THPO     |
| TGFBR1  | CASP3    |
| NRAS    | PDE4D    |
| EDNRB   | SERPINA3 |
| TGFBR2  | MPO      |
| CYP3A5  | ITGB3    |
| FGF2    | CXCL12   |
| HSPA4   | PON1     |
| ASXL1   | MIR210   |
| PROZ    | CCL2     |
| CALCA   | ICAM1    |
| IRF2BP2 | ACTA2    |
| GSR     | CSF3     |
| ABCA1   | BRCA2    |
| NOS2    | GLA      |
| FLT1    | MT-CO3   |
| NFE2L2  | IL4      |
| FAS     | RTEL1    |
| ITGAM   | BDNF     |
| CP      | INS      |
| MME     | APOH     |
| PPBP    | ELN      |
| XIAP    | REN      |
| POLG    | ABCB1    |
| PPOX    | HTRA1    |
| MMP2    | APOB     |
| F2R     | FGA      |
| TSPO    | IL1RN    |
| PROCR   | EDN1     |
| IL6R    | CALR     |
| KITLG   | HIF1A    |
| SPP1    | NOTCH1   |
| SLC2A10 | AKT1     |
| ACVRL1  | HP       |
| MIR146A | HLA-DRB1 |
| HADHA   | ELANE    |

|              |            |
|--------------|------------|
| ACTA2-AS1    | MYC        |
| ABCC1        | CSF2       |
| CPOX         | F7         |
| BCL2L1       | PLG        |
| TGFB3        | LPA        |
| GDNF         | CDKN2B-AS1 |
| JAK1         | MIR320A    |
| HDAC9        | LMNA       |
| CTNNB1       | PLA2G7     |
| ADORA1       | IFNG       |
| CFTR         | LPL        |
| LIPC         | MT-CO2     |
| HLA-A        | CXCR4      |
| ITGA2        | MB         |
| HSPA8        | SETD2      |
| STAT5A       | ANXA5      |
| CHEK2        | ALOX5      |
| TLR2         | HLA-B      |
| RNF213-AS1   | APP        |
| ENPP1        | MAPT       |
| CCR6         | RNF213     |
| PTGS1        | TTR        |
| MMP3         | PIK3C2A    |
| FOXE3        | SELE       |
| CD4          | PTPN11     |
| LEP          | FIP1L1     |
| MIF          | CYCS       |
| F9           | CDKN2B     |
| CCL11        | WT1        |
| FGFR1        | PTGS2      |
| SERPINA1     | EPO        |
| MBL2         | EPOR       |
| LOC102723566 | COL4A2     |
| BMP7         | IL18       |
| RETN         | CREB1      |
| PTPRC        | LOX        |
| GJA1         | TGFB1      |
| F13A1        | PECAM1     |
| FOS          | GUCY1A1    |
| IL2RA        | TLR3       |
| GBA          | SMAD4      |
| NR3C1        | ADORA2A    |
| ABCG2        | IL2        |
| PTX3         | ADM        |
| SLC6A4       | LCN2       |
| F12          | G6PD       |
| NLRP3        | ITGA2B     |

|          |          |
|----------|----------|
| HLA-DQB1 | ESR1     |
| SULT1A3  | SOD2     |
| KDR      | VHL      |
| JUN      | PPARG    |
| PSEN1    | IL3      |
| CBL      | PF4      |
| CD40     | SH2B3    |
| MAP2     | PTGIS    |
| TF       | TGFB2    |
| GATA4    | ATM      |
| IFNA1    | P2RY12   |
| GP6      | MYLK     |
| NGB      | ADIPOQ   |
| AGTR2    | HFE      |
| ABCC6    | EDNRA    |
| MAPK1    | C3       |
| SLC1A2   | PBX1     |
| SELL     | OLR1     |
| PARP1    | ENO2     |
| CFI      | PRKAR1A  |
| STAT1    | HBB      |
| GNB3     | CSF3R    |
| EGF      | SERPINF2 |
| IL13     | CD14     |
| NCAM1    | PRKG1    |
| KCNE2    | ADRB2    |
| CDKN1A   | AVP      |
| NKX2-5   | TNNI3    |
| CCL5     | HMGB1    |
| MTOR     | CD34     |
| TIMP1    | MIR15A   |
| CYP3A4   | PDGFRA   |
| NES      | TNNT2    |
| SAA1     | GPT      |
| ACE2     | VCAM1    |
| TH       | MT-CYB   |
| MMACHC   | NF1      |
| HSPA1A   | GSTM1    |
| STARP1   | IL17A    |
| KCNQ1    | MALAT1   |
| XDH      | MAPK3    |
| CYP1A1   | HMGCR    |
| ANPEP    | CD40LG   |
| SERPINI1 | CFH      |
| HBA1     | PON2     |
| CASP8    | ANGPT1   |
| IL7R     | CYP2C19  |



|           |          |
|-----------|----------|
| AOC3      | TNFRSF1A |
| ADA       | APOA1    |
| EP300     | VKORC1   |
| ITGB2     | U2AF1    |
| MIR34A    | AQP4     |
| CSF1R     | CTLA4    |
| BRCC3     | F10      |
| LBP       | CCL3     |
| S100B     | MDM2     |
| MIAT      | MIR16-1  |
| TBXA2R    | SEPTIN9  |
| SST       | MIR21    |
| F8        | MBP      |
| TNFRSF11B | SIRT1    |
| ACTC1     | FGF      |
| TANGO2    | CCND1    |
| AGER      | HMOX1    |
| SMAD2     | COL3A1   |
| GSTP1     | IGF1     |
| PDGFRB    | KNG1     |
| CD46      | IL1A     |
| MFAP5     | SMAD3    |
| MIR17     | GATA3    |
| SRC       | CASP1    |
| FOXP3     | CASP9    |
| HGF       | BCL2     |
| MIR9-1    | HRAS     |
| CBS       | CCR5     |
| NOS1      | LTA      |
| ADD1      | SOD1     |
| ENTPD1    | TGFBR1   |
| FASLG     | NRAS     |
| FCGR2A    | EDNRB    |
| ASS1      | TGFBR2   |
| IL1R1     | CYP3A5   |
| CETP      | FGF2     |
| SCN1A     | HSPA4    |
| GFAP      | ASXL1    |
| EZH2      | PROZ     |
| SLC22A12  | CALCA    |
| ACHE      | IRF2BP2  |
| SCN5A     | GSR      |
| MIR125A   | ABCA1    |
| ADORA3    | NOS2     |
| FN1       | FLT1     |
| TREX1     | NFE2L2   |
| NDE1      | FAS      |

|           |            |
|-----------|------------|
| SLC19A1   | ITGAM      |
| MAT2A     | CP         |
| MMP1      | PPBP       |
| CAT       | XIAP       |
| XRCC1     | POLG       |
| CHAT      | PPOX       |
| CEBPB     | MMP2       |
| SERPIND1  | F2R        |
| CD36      | TSP0       |
| MAPK8     | PROCR      |
| RUNX2     | IL6R       |
| PRL       | KITLG      |
| MYH7      | SPP1       |
| CD8A      | SLC2A10    |
| CSF1      | ACVRL1     |
| MTAP      | MIR146A    |
| RTN4      | ACTA2-AS1  |
| IFIH1     | ABCC1      |
| SLC2A9    | CPOX       |
| CDK4      | BCL2L1     |
| DARS2     | TGFB3      |
| MAPK14    | GDNF       |
| VDR       | JAK1       |
| GDF15     | HDAC9      |
| PKD1      | CTNNB1     |
| OTC       | ADORA1     |
| MIR27A    | CFTR       |
| MEN1      | LIPC       |
| SLC17A5   | HLA-A      |
| TEK       | ITGA2      |
| NQO1      | HSPA8      |
| TERC      | STAT5A     |
| MIR142    | CHEK2      |
| ITGAL     | TLR2       |
| CXCL10    | RNF213-AS1 |
| COL4A5    | ENPP1      |
| ITIH4     | CCR6       |
| AUTS2     | PTGS1      |
| CD79A     | MMP3       |
| RYR1      | FOXE3      |
| POMC      | CD4        |
| MIR221    | LEP        |
| ITGB1     | MIF        |
| CASP2     | F9         |
| CCR2      | CCL11      |
| TNFRSF12A | FGFR1      |
| ANGPT2    | SERPINA1   |

|                |              |
|----------------|--------------|
| CYP2C9         | MBL2         |
| NTF3           | LOC102723566 |
| FLVCR2         | BMP7         |
| HEY2           | RETN         |
| MIR451A        | PTPRC        |
| B2M            | GJA1         |
| EGFR           | F13A1        |
| CD28           | FOS          |
| DCX            | IL2RA        |
| LOC106627981   | GBA          |
| BACE1          | NR3C1        |
| H2AC18         | ABCG2        |
| GHRL           | PTX3         |
| NPY            | SLC6A4       |
| F11            | F12          |
| ECE1           | NLRP3        |
| AIF1           | HLA-DQB1     |
| CX3CR1         | SULT1A3      |
| IL5            | KDR          |
| BRAF           | JUN          |
| LGALS3         | PSEN1        |
| PDE5A          | CBL          |
| HAVCR2         | CD40         |
| PRNP           | MAP2         |
| PROM1          | TF           |
| BCL2L11        | GATA4        |
| RPL36A-HNRNPH2 | IFNA1        |
| CFB            | GP6          |
| SON            | NGB          |
| SMPD1          | AGTR2        |
| SOCS1          | ABCC6        |
| MIR181A1       | MAPK1        |
| ERCC6          | SLC1A2       |
| PROC           | SELL         |
| CD163          | PARP1        |
| PPARA          | CFI          |
| MYBPC3         | STAT1        |
| TNFSF10        | GNB3         |
| EPHX2          | EGF          |
| MTR            | IL13         |
| MIR199A1       | NCAM1        |
| SPI1           | KCNE2        |
| NGF            | CDKN1A       |
| SRFBP1         | NKX2-5       |
| CD44           | CCL5         |
| IL3RA          | MTOR         |
| MIR199B        | TIMP1        |

|          |           |
|----------|-----------|
| BRCA1    | CYP3A4    |
| IL15     | NES       |
| TFRC     | SAA1      |
| ZMPSTE24 | ACE2      |
| MEIS1    | TH        |
| MIRLET7B | MMACHC    |
| APOC3    | HSPA1A    |
| KCNJ5    | STARP1    |
| FCGR3B   | KCNQ1     |
| HAVCR1   | XDH       |
| MIR499A  | CYP1A1    |
| MT-ND2   | ANPEP     |
| PMM2     | SERPINI1  |
| NR1H2    | HBA1      |
| IL4R     | CASP8     |
| SYK      | IL7R      |
| PRTN3    | AOC3      |
| SMARCA4  | ADA       |
| KL       | EP300     |
|          | ITGB2     |
|          | MIR34A    |
|          | CSF1R     |
|          | BRCC3     |
|          | LBP       |
|          | S100B     |
|          | MIAT      |
|          | TBXA2R    |
|          | SST       |
|          | F8        |
|          | TNFRSF11B |
|          | ACTC1     |
|          | TANGO2    |
|          | AGER      |
|          | SMAD2     |
|          | GSTP1     |
|          | PDGFRB    |
|          | CD46      |
|          | MFAP5     |
|          | MIR17     |
|          | SRC       |
|          | FOXP3     |
|          | HGF       |
|          | MIR9-1    |
|          | CBS       |
|          | NOS1      |
|          | ADD1      |
|          | ENTPD1    |

FASLG  
FCGR2A  
ASS1  
IL1R1  
CETP  
SCN1A  
GFAP  
EZH2  
SLC22A12  
ACHE  
SCN5A  
MIR125A  
ADORA3  
FN1  
TREX1  
NDE1  
SLC19A1  
MAT2A  
MMP1  
CAT  
XRCC1  
CHAT  
CEBPB  
SERPIND1  
CD36  
MAPK8  
RUNX2  
PRL  
MYH7  
CD8A  
CSF1  
MTAP  
RTN4  
IFIH1  
SLC2A9  
CDK4  
DARS2  
MAPK14  
VDR  
GDF15  
PKD1  
OTC  
MIR27A  
MEN1  
SLC17A5  
TEK  
NQO1

TERC  
MIR142  
ITGAL  
CXCL10  
COL4A5  
ITIH4  
AUTS2  
CD79A  
RYS1  
POMC  
MIR221  
ITGB1  
CASP2  
CCR2  
TNFRSF12A  
ANGPT2  
CYP2C9  
NTF3  
FLVCR2  
HEY2  
MIR451A  
B2M  
EGFR  
CD28  
DCX  
LOC106627981  
BACE1  
H2AC18  
GHRL  
NPY  
F11  
ECE1  
AIF1  
CX3CR1  
IL5  
BRAF  
LGALS3  
PDE5A  
HAVCR2  
PRNP  
PROM1  
BCL2L11  
RPL36A-HNRNPH2  
CFB  
SON  
SMPD1  
SOCS1

MIR181A1  
ERCC6  
PROC  
CD163  
PPARA  
MYBPC3  
TNFSF10  
EPHX2  
MTR  
MIR199A1  
SPI1  
NGF  
SRFBP1  
CD44  
IL3RA  
MIR199B  
BRCA1  
IL15  
TFRC  
ZMPSTE24  
MEIS1  
MIRLET7B  
APOC3  
KCNJ5  
FCGR3B  
HAVCR1  
MIR499A  
MT-ND2  
PMM2  
NR1H2  
IL4R  
SYK  
PRTN3  
SMARCA4  
KL
