# Supplementary material for: The Neuroprotective Effect of Shenmai Injection on Oxidative Stress Injury in PC12 Cells Based on Network Pharmacology
Source: Hindawi journal article supplement (doi:10.1155/2022/6969740), 2022-05-27
Supplement: f1 [file 6969740.f1.zip]

**Red ginseng**

| component       | target   |
|-----------------|----------|
| ginsenoside Rh4 | STAT3    |
| HEXACOSANE      | SHBG     |
| HEXACOSANE      | SPHK2    |
| Octacosane      | SHBG     |
| N tetracosane   | SHBG     |
| Heptacosane     | SHBG     |
| Heptacosane     | SPHK2    |
| beta-sitosterol | AR       |
| beta-sitosterol | HMGCR    |
| beta-sitosterol | CYP51A1  |
| beta-sitosterol | NPC1L1   |
| beta-sitosterol | NR1H3    |
| beta-sitosterol | CYP19A1  |
| beta-sitosterol | CYP17A1  |
| beta-sitosterol | RORC     |
| beta-sitosterol | ESR1     |
| beta-sitosterol | ESR2     |
| beta-sitosterol | SREBF2   |
| beta-sitosterol | SHBG     |
| beta-sitosterol | SLC6A2   |
| beta-sitosterol | CYP2C19  |
| beta-sitosterol | RORA     |
| beta-sitosterol | PTPN1    |
| beta-sitosterol | BCHE     |
| beta-sitosterol | SERPINA6 |
| beta-sitosterol | SLC6A4   |
| beta-sitosterol | CHRM2    |
| beta-sitosterol | VDR      |
| beta-sitosterol | ACHE     |
| beta-sitosterol | G6PD     |
| beta-sitosterol | NR1H2    |
| beta-sitosterol | GLRA1    |
| beta-sitosterol | CES2     |
| beta-sitosterol | PTGER1   |
| beta-sitosterol | PTGER2   |
| beta-sitosterol | HSD11B1  |
| beta-sitosterol | PTGES    |
| beta-sitosterol | CDC25A   |
| beta-sitosterol | PPARA    |
| beta-sitosterol | PPARD    |
| beta-sitosterol | DHCR7    |
| beta-sitosterol | SQLE     |
| beta-sitosterol | PTPN6    |
| beta-sitosterol | NR1I3    |
| beta-sitosterol | FDFT1    |

**Ophiopogonis Radix**

| component                | target  |
|--------------------------|---------|
| methyl ophiopogonanone b | ABCG2   |
| methyl ophiopogonanone b | ESR1    |
| methyl ophiopogonanone b | ESR2    |
| methyl ophiopogonanone b | HSD17B1 |
| methyl ophiopogonanone b | CYP19A1 |
| methyl ophiopogonanone b | ADORA1  |
| methyl ophiopogonanone b | ADORA3  |
| methyl ophiopogonanone b | CA12    |
| methyl ophiopogonanone b | CA7     |
| methyl ophiopogonanone b | CYP1B1  |
| methyl ophiopogonanone b | SRC     |
| methyl ophiopogonanone b | GRM2    |
| methyl ophiopogonanone b | CA4     |
| methyl ophiopogonanone b | MAOB    |
| methyl ophiopogonanone b | ABCC1   |
| methyl ophiopogonanone b | PTGS1   |
| methyl ophiopogonanone b | SHBG    |
| methyl ophiopogonanone b | KIT     |
| methyl ophiopogonanone b | MET     |
| methyl ophiopogonanone b | CTSB    |
| methyl ophiopogonanone b | KDR     |
| methyl ophiopogonanone b | CDK4    |
| methyl ophiopogonanone b | TAS2R31 |
| methyl ophiopogonanone b | CTSL    |
| methyl ophiopogonanone b | CBR1    |
| methyl ophiopogonanone b | BACE1   |
| methyl ophiopogonanone b | MMP13   |
| methyl ophiopogonanone b | THRA    |
| methyl ophiopogonanone b | THRB    |
| methyl ophiopogonanone b | CDK2    |
| methyl ophiopogonanone b | ASF1A   |
| methyl ophiopogonanone b | DNM1    |
| methyl ophiopogonanone b | CES1    |
| methyl ophiopogonanone b | CES2    |
| methyl ophiopogonanone b | FLT3    |
| methyl ophiopogonanone b | PTGS2   |
| methyl ophiopogonanone b | SIRT2   |
| methyl ophiopogonanone b | FGFR1   |
| methyl ophiopogonanone b | CHRNA7  |
| methyl ophiopogonanone b | RAF1    |
| methyl ophiopogonanone b | BRAF    |
| methyl ophiopogonanone b | MMP12   |
| methyl ophiopogonanone b | EPHB4   |
| methyl ophiopogonanone b | FOS     |
| methyl ophiopogonanone b | ABL1    |

|                             |         |                          |          |
|-----------------------------|---------|--------------------------|----------|
| beta-sitosterol             | SIGMAR1 | methyl ophiopogonanone b | EPHA2    |
| beta-sitosterol             | NOS2    | methyl ophiopogonanone b | LCK      |
| beta-sitosterol             | NR3C1   | methyl ophiopogonanone b | EPHB2    |
| beta-sitosterol             | PPARG   | methyl ophiopogonanone b | EPHA5    |
| beta-sitosterol             | CDC25B  | methyl ophiopogonanone b | EPHA4    |
| beta-sitosterol             | UGT2B7  | methyl ophiopogonanone b | EPHA8    |
| beta-sitosterol             | HSD11B2 | methyl ophiopogonanone b | MKNK2    |
| beta-sitosterol             | POLB    | methyl ophiopogonanone b | EPHA7    |
| N nonacosane                | SHBG    | methyl ophiopogonanone b | EPHB3    |
| Ginsenoside Rh1             | STAT3   | methyl ophiopogonanone b | EPHA3    |
| 20(R)-ProtopanaxatriPTPN1   |         | methyl ophiopogonanone b | EPHB1    |
| 20(R)-ProtopanaxatriCYP2C19 |         | methyl ophiopogonanone b | EPHA1    |
| 20(R)-ProtopanaxatriCHRM2   |         | methyl ophiopogonanone b | HSD17B2  |
| 20(R)-ProtopanaxatriSLC6A2  |         | methyl ophiopogonanone b | RPS6KB1  |
| 20(R)-ProtopanaxatriSLC6A4  |         | methyl ophiopogonanone b | AURKA    |
| 20(R)-ProtopanaxatriAR      |         | methyl ophiopogonanone b | AURKB    |
| 20(R)-ProtopanaxatriACHE    |         | methyl ophiopogonanone b | F3       |
| 20(R)-ProtopanaxatriHSD11B1 |         | methyl ophiopogonanone b | PTPN1    |
| 20(R)-ProtopanaxatriESR1    |         | methyl ophiopogonanone b | SERPINE1 |
| 20(R)-ProtopanaxatriCYP19A1 |         | methyl ophiopogonanone b | HSP90AB1 |
| 20(R)-ProtopanaxatriATP12A  |         | methyl ophiopogonanone b | CHEK1    |
| 20(R)-ProtopanaxatriNR1H3   |         | methyl ophiopogonanone b | PDK1     |
| 20(R)-ProtopanaxatriHMGR    |         | methyl ophiopogonanone b | WEE1     |
| 20(R)-ProtopanaxatriCYP51A1 |         | methyl ophiopogonanone b | BCL2L1   |
| 20(R)-ProtopanaxatriNPC1L1  |         | methyl ophiopogonanone b | POLB     |
| 20(R)-ProtopanaxatriRORC    |         | methyl ophiopogonanone b | MELK     |
| 20(R)-ProtopanaxatriSREBF2  |         | methyl ophiopogonanone b | EIF2AK2  |
| 20(R)-ProtopanaxatriCYP17A1 |         | methyl ophiopogonanone b | ALOX12   |
| 20(R)-ProtopanaxatriPTGS2   |         | methyl ophiopogonanone b | ANPEP    |
| 20(R)-ProtopanaxatriPDE10A  |         | methyl ophiopogonanone b | CDK9     |
| 20(R)-ProtopanaxatriUGT2B7  |         | methyl ophiopogonanone b | SYK      |
| 20(R)-ProtopanaxatriNR1I3   |         | methyl ophiopogonanone b | CCNA2    |
| 20(R)-ProtopanaxatriPTGES   |         | methyl ophiopogonanone b | CDK5     |
| 20(R)-ProtopanaxatriPIK3CB  |         | methyl ophiopogonanone b | CLK4     |
| 20(R)-ProtopanaxatriALK     |         | methyl ophiopogonanone b | CLK2     |
| 20(R)-ProtopanaxatriPDE2A   |         | methyl ophiopogonanone b | CLK3     |
| 20(R)-ProtopanaxatriPDE4B   |         | methyl ophiopogonanone b | DYRK2    |
| 20(R)-ProtopanaxatriPIK3CD  |         | methyl ophiopogonanone b | DYRK3    |
| 20(R)-ProtopanaxatriPIK3CG  |         | methyl ophiopogonanone b | AKR1B1   |
| 20(R)-ProtopanaxatriPIK3CA  |         | methyl ophiopogonanone b | AKT1     |
| 20(R)-ProtopanaxatriTTL     |         | methyl ophiopogonanone b | PLA2G5   |
| 20(R)-ProtopanaxatriMAPK8   |         | methyl ophiopogonanone b | PLA2G10  |
| 20(R)-ProtopanaxatriSMO     |         | methyl ophiopogonanone b | STAT6    |
| 20(R)-ProtopanaxatriDRD1    |         | methyl ophiopogonanone b | HSP90AA1 |
| 20(R)-ProtopanaxatriDRD2    |         | methyl ophiopogonanone b | BMP1     |
| 20(R)-ProtopanaxatriDRD3    |         | methyl ophiopogonanone b | ALOX15   |
| 20(R)-ProtopanaxatriMTOR    |         | methyl ophiopogonanone b | PLA2G1B  |

|                                 |                          |          |
|---------------------------------|--------------------------|----------|
| 20 (R) -ProtopanaxatriBCHE      | methyl ophiopogonanone b | LTB4R    |
| 20 (R) -ProtopanaxatriPSEN2     | methyl ophiopogonanone b | GRM5     |
| 20 (R) -ProtopanaxatriCCNC CDK8 | methyl ophiopogonanone b | KLK1     |
| 20 (R) -ProtopanaxatriCDK8      | methyl ophiopogonanone b | KLK2     |
| 20 (R) -ProtopanaxatriPPP1CC    | methyl ophiopogonanone b | TRPM8    |
| 20 (R) -ProtopanaxatriPPP2CA    | methyl ophiopogonanone b | RXRA     |
| 20 (R) -ProtopanaxatriVDR       | methyl ophiopogonanone b | HNF4A    |
| 20 (R) -ProtopanaxatriAVPR1A    | methyl ophiopogonanone b | SLC29A1  |
| 20 (R) -ProtopanaxatriCAPN2     | methyl ophiopogonanone b | JUN      |
| 20 (R) -ProtopanaxatriINSR      | methyl ophiopogonanone b | CCNT1    |
| 20 (R) -ProtopanaxatriJAK1      | methyl ophiopogonanone b | CDK2     |
| 20 (R) -ProtopanaxatriJAK2      | Ophiopogonin B           | STAT3    |
| 20 (R) -ProtopanaxatriF2R       | Ophiopogonin D           | IL2      |
| 20 (R) -ProtopanaxatriCRHR1     | Ophiopogonin D           | STAT3    |
| 20 (R) -ProtopanaxatriCYP2C9    | Stigmasterol             | ESR1     |
| 20 (R) -ProtopanaxatriCOL4A3BP  | Stigmasterol             | SLC6A2   |
| 20 (R) -ProtopanaxatriCYP3A4    | Stigmasterol             | CYP2C19  |
| 20 (R) -ProtopanaxatriGPR55     | Stigmasterol             | CYP19A1  |
| 20 (R) -ProtopanaxatriGPR18     | Stigmasterol             | PPARA    |
| 20 (R) -ProtopanaxatriITGAL     | Stigmasterol             | CNR2     |
| 20 (R) -ProtopanaxatriPYGL      | Stigmasterol             | SLC6A4   |
| 20 (R) -ProtopanaxatriSTAT3     | Stigmasterol             | CHRM2    |
| 20 (R) -ProtopanaxatriPTGS1     | Stigmasterol             | ACHE     |
| 20 (R) -ProtopanaxatriHSP90AA1  | Stigmasterol             | PTPN1    |
| 20 (R) -ProtopanaxatriSCN9A     | Stigmasterol             | AR       |
| 20 (R) -ProtopanaxatriCCNT1     | Stigmasterol             | SIGMAR1  |
| 20 (R) -ProtopanaxatriPCSK7     | Stigmasterol             | SREBF2   |
| 20 (R) -ProtopanaxatriOPRM1     | Stigmasterol             | NPC1L1   |
| 20 (R) -ProtopanaxatriOPRD1     | Stigmasterol             | ESR2     |
| 20 (R) -ProtopanaxatriCYP2D6    | Stigmasterol             | CTSD     |
| 20 (R) -ProtopanaxatriACACB     | Stigmasterol             | SHBG     |
| 20 (R) -ProtopanaxatriMAPK14    | Stigmasterol             | HMGCR    |
| 20 (R) -ProtopanaxatriALPL      | Stigmasterol             | CYP51A1  |
| 20 (R) -ProtopanaxatriPDE5A     | Stigmasterol             | CXCR3    |
| 20 (R) -ProtopanaxatriADORA1    | Stigmasterol             | SLC18A2  |
| 20 (R) -ProtopanaxatriADORA2A   | Stigmasterol             | SLC6A9   |
| 20 (R) -ProtopanaxatriADORA2B   | Stigmasterol             | SRD5A1   |
| 20 (R) -ProtopanaxatriCALCRL    | Stigmasterol             | SRD5A2   |
| 20 (R) -ProtopanaxatriCCR2      | Stigmasterol             | SERPINA6 |
| 20 (R) -ProtopanaxatriHCRTR2    | Stigmasterol             | NR1I2    |
| 20 (R) -ProtopanaxatriHCRTR1    | Stigmasterol             | HSD17B3  |
| 20 (R) -ProtopanaxatriPGC       | Stigmasterol             | FABP1    |
| 20 (R) -ProtopanaxatriCTSD      | ophiopogonanone A        | CA12     |
| 20 (R) -ProtopanaxatriREN       | ophiopogonanone A        | MET      |
| 20 (R) -ProtopanaxatriCTSE      | ophiopogonanone A        | KDR      |
| 20 (R) -ProtopanaxatriPGA5      | ophiopogonanone A        | CYP1B1   |
| 20 (R) -ProtopanaxatriPSENEN    | ophiopogonanone A        | CA7      |

20 (R)-ProtopanaxatriolCSTN  
20 (R)-ProtopanaxatriolAPH1A  
20 (R)-ProtopanaxatriolPSEN1  
20 (R)-ProtopanaxatriolAPH1B  
Ginsenoside RG1 STAT3  
20 (S)-Ginsenoside RhSTAT3

|                   |         |
|-------------------|---------|
| ophiopogonanone A | YWHAG   |
| ophiopogonanone A | SYK     |
| ophiopogonanone A | WEE1    |
| ophiopogonanone A | CDK2    |
| ophiopogonanone A | CDK4    |
| ophiopogonanone A | MAP3K8  |
| ophiopogonanone A | ANPEP   |
| ophiopogonanone A | ALOX12  |
| ophiopogonanone A | AURKA   |
| ophiopogonanone A | SHBG    |
| ophiopogonanone A | DNM1    |
| ophiopogonanone A | EZR     |
| ophiopogonanone A | ATP4B   |
| ophiopogonanone A | RPS6KA3 |
| ophiopogonanone A | ADORA2A |
| ophiopogonanone A | MMP12   |
| ophiopogonanone A | ABL1    |
| ophiopogonanone A | PRKDC   |
| ophiopogonanone A | HCK     |
| ophiopogonanone A | EPHB4   |
| ophiopogonanone A | ERN1    |
| ophiopogonanone A | FLT3    |
| ophiopogonanone A | IKBKB   |
| ophiopogonanone A | JAK3    |
| ophiopogonanone A | PDPK1   |
| ophiopogonanone A | LCK     |
| ophiopogonanone A | GSK3B   |
| ophiopogonanone A | JAK2    |
| ophiopogonanone A | ALK     |
| ophiopogonanone A | VCP     |
| ophiopogonanone A | CCNE1   |
| ophiopogonanone A | AURKB   |
| ophiopogonanone A | CCNE1   |
| ophiopogonanone A | BCL2L1  |
| ophiopogonanone A | MMP25   |
| ophiopogonanone A | CDK9    |
| ophiopogonanone A | MMP16   |
| ophiopogonanone A | CCNA2   |
| ophiopogonanone A | CDK1    |
| ophiopogonanone A | ADCY5   |
| ophiopogonanone A | ALPG    |
| ophiopogonanone A | BMP1    |
| ophiopogonanone A | CDK5    |
| ophiopogonanone A | MMP7    |
| ophiopogonanone A | CLK4    |
| ophiopogonanone A | CLK2    |
| ophiopogonanone A | DYRK3   |

|                   |          |
|-------------------|----------|
| ophiopogonanone A | ADAM10   |
| ophiopogonanone A | CDK5     |
| ophiopogonanone A | CDC7     |
| ophiopogonanone A | CDK2     |
| ophiopogonanone A | ATP4A    |
| ophiopogonanone A | CDK2     |
| ophiopogonanone A | CDK3     |
| ophiopogonanone A | CCNT1    |
| ophiopogonanone A | CCNE1    |
| ophiopogonanone C | KIT      |
| ophiopogonanone C | HSP90AB1 |
| ophiopogonanone C | CBR1     |
| ophiopogonanone C | HSP90AA1 |
| ophiopogonanone C | HSP90B1  |
| ophiopogonanone C | FGFR1    |
| ophiopogonanone C | CA4      |
| ophiopogonanone C | GCCR     |
| ophiopogonanone C | SIRT1    |
| ophiopogonanone C | TAS2R31  |
| ophiopogonanone C | ESR1     |
| ophiopogonanone C | ESR2     |
| ophiopogonanone C | CYP19A1  |
| ophiopogonanone C | LTB4R    |
| ophiopogonanone C | CA12     |
| ophiopogonanone C | CTSB     |
| ophiopogonanone C | PDE10A   |
| ophiopogonanone C | EGLN1    |
| ophiopogonanone C | DNASE1L3 |
| ophiopogonanone C | CYP1B1   |
| ophiopogonanone C | GRM2     |
| ophiopogonanone C | MET      |
| ophiopogonanone C | PTGS2    |
| ophiopogonanone C | ADORA1   |
| ophiopogonanone C | NOX4     |
| ophiopogonanone C | SHBG     |
| ophiopogonanone C | CFTR     |
| ophiopogonanone C | OPRD1    |
| ophiopogonanone C | ALOX15   |
| ophiopogonanone C | PDE5A    |
| ophiopogonanone C | ABCG2    |
| ophiopogonanone C | CA7      |
| ophiopogonanone C | CDK1     |
| ophiopogonanone C | NOS2     |
| ophiopogonanone C | IKBKB    |
| ophiopogonanone C | EDNRA    |
| ophiopogonanone C | ALOX12   |
| ophiopogonanone C | AKT1     |

|                 |   |          |
|-----------------|---|----------|
| ophiopogonanone | C | CTSL     |
| ophiopogonanone | C | BCL2L1   |
| ophiopogonanone | C | TNNC1    |
| ophiopogonanone | C | ALPL     |
| ophiopogonanone | C | SRC      |
| ophiopogonanone | C | CDK4     |
| ophiopogonanone | C | BACE1    |
| ophiopogonanone | C | PIK3CG   |
| ophiopogonanone | C | TNNT2    |
| ophiopogonanone | C | TNNI3    |
| ophiopogonanone | e | TAS2R31  |
| ophiopogonanone | e | ABCG2    |
| ophiopogonanone | e | MET      |
| ophiopogonanone | e | KDR      |
| ophiopogonanone | e | SRC      |
| ophiopogonanone | e | KIT      |
| ophiopogonanone | e | FGFR1    |
| ophiopogonanone | e | CYP1B1   |
| ophiopogonanone | e | ESR1     |
| ophiopogonanone | e | ESR2     |
| ophiopogonanone | e | CA7      |
| ophiopogonanone | e | CA12     |
| ophiopogonanone | e | CA4      |
| ophiopogonanone | e | ADORA1   |
| ophiopogonanone | e | ADORA3   |
| ophiopogonanone | e | CDK2     |
| ophiopogonanone | e | CDK4     |
| ophiopogonanone | e | HSP90AB1 |
| ophiopogonanone | e | GUSB     |
| ophiopogonanone | e | PTGS1    |
| ophiopogonanone | e | ALOX12   |
| ophiopogonanone | e | HSD17B1  |
| ophiopogonanone | e | MMP13    |
| ophiopogonanone | e | EIF2AK2  |
| ophiopogonanone | e | CDK1     |
| ophiopogonanone | e | KCNA3    |
| ophiopogonanone | e | CYP19A1  |
| ophiopogonanone | e | CHRNA7   |
| ophiopogonanone | e | EPHB4    |
| ophiopogonanone | e | BRAF     |
| ophiopogonanone | e | ALOX15   |
| ophiopogonanone | e | PARP1    |
| ophiopogonanone | e | SGK1     |
| ophiopogonanone | e | MAOB     |
| ophiopogonanone | e | AURKB    |
| ophiopogonanone | e | RPS6KB1  |
| ophiopogonanone | e | AURKA    |

|                   |         |
|-------------------|---------|
| ophiopogonanone e | DUSP3   |
| ophiopogonanone e | MMP12   |
| ophiopogonanone e | CA3     |
| ophiopogonanone e | BACE1   |
| ophiopogonanone e | FLT3    |
| ophiopogonanone e | MKNK2   |
| ophiopogonanone e | CA2     |
| ophiopogonanone e | CA1     |
| ophiopogonanone e | CDK2    |
| ophiopogonanone e | LTB4R   |
| ophiopogonanone e | SPHK2   |
| ophiopogonanone e | SPHK1   |
| ophiopogonanone e | ALOX5   |
| ophiopogonanone e | SFRP1   |
| ophiopogonanone e | GCGR    |
| ophiopogonanone e | ASF1A   |
| ophiopogonanone e | AKT1    |
| ophiopogonanone e | CA6     |
| ophiopogonanone e | CA13    |
| ophiopogonanone e | CA5B    |
| ophiopogonanone e | CA5A    |
| ophiopogonanone e | MMP8    |
| ophiopogonanone e | CHEK1   |
| ophiopogonanone e | WEE1    |
| ophiopogonanone e | TGFBRI  |
| ophiopogonanone e | ACHE    |
| ophiopogonanone e | HMGCR   |
| ophiopogonanone e | FOS     |
| ophiopogonanone e | KLK1    |
| ophiopogonanone e | KLK2    |
| ophiopogonanone e | ABCC1   |
| ophiopogonanone e | BMP1    |
| ophiopogonanone e | TNF     |
| ophiopogonanone e | CTSB    |
| ophiopogonanone e | HPGDS   |
| ophiopogonanone e | CCNA1   |
| ophiopogonanone e | JUN     |
| ophiopogonanone e | CCNA2   |
| uridine           | CDA     |
| uridine           | ADA     |
| uridine           | PYGM    |
| uridine           | TK1     |
| orchinol          | ALOX5   |
| orchinol          | HSD17B3 |
| orchinol          | CYP11B1 |
| orchinol          | CYP11B2 |
| orchinol          | CYP17A1 |



|          |          |
|----------|----------|
| orchinol | CDK5R1   |
| orchinol | CCNE2    |
| orchinol | CCNB3    |
| orchinol | CDK2     |
| orchinol | GSK3B    |
| orchinol | GSK3A    |
| orchinol | CDK5     |
| orchinol | CFTR     |
| orchinol | DCTPP1   |
| orchinol | QDPR     |
| orchinol | CHRNA3   |
| orchinol | CHRNA7   |
| orchinol | TRPV1    |
| orchinol | HTT      |
| orchinol | SIGMAR1  |
| orchinol | MMP9     |
| orchinol | MMP1     |
| orchinol | MMP2     |
| orchinol | MAOB     |
| orchinol | CCND3    |
| orchinol | HDAC6    |
| orchinol | HDAC1    |
| orchinol | BRAF     |
| orchinol | ABL1     |
| orchinol | EGFR     |
| orchinol | SRC      |
| orchinol | PRKCA    |
| orchinol | CDK1     |
| orchinol | MET      |
| orchinol | NQO2     |
| orchinol | DYRK1A   |
| orchinol | LNPEP    |
| orchinol | COMT     |
| orchinol | CA1      |
| orchinol | CA12     |
| orchinol | CA14     |
| orchinol | MAP2K1   |
| orchinol | CA9      |
| orchinol | CA4      |
| orchinol | CA13     |
| orchinol | CA5B     |
| orchinol | CA5A     |
| orchinol | ADORA1   |
| orchinol | ERBB2    |
| orchinol | CA2      |
| orchinol | MAPKAPK2 |
| orchinol | HSD17B2  |

|          |         |
|----------|---------|
| orchinol | MAOA    |
| orchinol | MIF     |
| orchinol | AKT1    |
| orchinol | DAO     |
| orchinol | ALPG    |
| orchinol | PLAA    |
| orchinol | CNR2    |
| orchinol | GRM5    |
| orchinol | OPRD1   |
| orchinol | MKNK1   |
| orchinol | RET     |
| orchinol | KDR     |
| orchinol | RAF1    |
| orchinol | JAK2    |
| orchinol | PARP1   |
| orchinol | TNKS2   |
| orchinol | TNKS    |
| orchinol | MME     |
| orchinol | ESR1    |
| orchinol | ESR2    |
| orchinol | AR      |
| orchinol | CDK4    |
| orchinol | PIM1    |
| orchinol | GABRB3  |
| orchinol | PLA2G2A |
| orchinol | FGFR1   |
| orchinol | TGFBR1  |
| orchinol | RPS6KA3 |
| orchinol | OPRK1   |
| orchinol | MGLL    |
| orchinol | CDC25B  |
| orchinol | LCK     |
| orchinol | TUBB3   |
| orchinol | PSEN2   |
| orchinol | CDC25A  |
| orchinol | RPS6KA2 |
| orchinol | QPCT    |
| orchinol | MTOR    |
| orchinol | PIK3CA  |
| orchinol | JAK3    |
| orchinol | ALK     |
| orchinol | KIF11   |
| orchinol | CHEK1   |
| orchinol | ADORA2A |
| orchinol | ADORA2B |
| orchinol | ADORA3  |
| orchinol | PGR     |

|                 |          |
|-----------------|----------|
| orchinol        | MAPK14   |
| orchinol        | CDK5     |
| orchinol        | CDK2     |
| orchinol        | CDK1     |
| orchinol        | CCNA1    |
| orchinol        | CHRNA4   |
| orchinol        | CCND1    |
| orchinol        | GABRG2   |
| orchinol        | PSENEN   |
| orchinol        | CCNE1    |
| orchinol        | CCNB1    |
| orchinol        | CCNA2    |
| orchinol        | CDK4     |
| orchinol        | GABRA5   |
| orchinol        | NCSTN    |
| orchinol        | CCNB2    |
| orchinol        | CCND2    |
| orchinol        | APH1A    |
| orchinol        | PSEN1    |
| orchinol        | APH1B    |
| ophiopogon A    | STAT3    |
| ophiopogonone A | HSP90AB1 |
| ophiopogonone A | NQO1     |
| ophiopogonone A | HSP90AA1 |
| ophiopogonone A | CNR1     |
| ophiopogonone A | HSP90B1  |
| ophiopogonone A | GCCR     |
| ophiopogonone A | CDK1     |
| ophiopogonone A | GPR55    |
| ophiopogonone A | AKR1B1   |
| ophiopogonone A | ALPL     |
| ophiopogonone A | CHEK1    |
| ophiopogonone A | GRIN2B   |
| ophiopogonone A | CDC7     |
| ophiopogonone A | CDC25B   |
| ophiopogonone A | CDK5R1   |
| ophiopogonone A | DNASE1L3 |
| ophiopogonone A | OPRM1    |
| ophiopogonone A | PIK3CG   |
| ophiopogonone A | TNNC1    |
| ophiopogonone A | CDK5     |
| ophiopogonone A | TNNT2    |
| ophiopogonone A | TNNI3    |
| ophiopogonone B | NQO1     |
| ophiopogonone B | CNR1     |
| ophiopogonone B | HSP90AB1 |
| ophiopogonone B | GPR55    |

|                          |          |
|--------------------------|----------|
| ophiopogonone B          | HSP90AA1 |
| ophiopogonone B          | GCGR     |
| ophiopogonone B          | CYP11B1  |
| ophiopogonone B          | CYP11B2  |
| ophiopogonone B          | ALPL     |
| ophiopogonone B          | ABCB1    |
| ophiopogonone B          | AKR1B1   |
| ophiopogonone B          | CNR2     |
| ophiopogonone B          | PCSK7    |
| ophiopogonone B          | CYP2C9   |
| ophiopogonone B          | HSP90B1  |
| ophiopogonone B          | SHBG     |
| ophiopogonone B          | CYP19A1  |
| ophiopogonone B          | PDE10A   |
| ophiopogonone B          | CBR1     |
| ophiopogonone B          | CFTR     |
| ophiopogonone B          | GPR84    |
| ophiopogonone B          | PDK1     |
| ophiopogonone B          | AR       |
| ophiopogonone B          | GRIN2B   |
| ophiopogonone B          | CHEK1    |
| ophiopogonone B          | MAOA     |
| ophiopogonone B          | CLK1     |
| ophiopogonone B          | HSD17B3  |
| ophiopogonone B          | CCNB3    |
| ophiopogonone B          | CDK1     |
| ophiopogonone B          | CCNB1    |
| ophiopogonone B          | CCNB2    |
| N-Trans-Feruloyltyramine | MMP9     |
| N-Trans-Feruloyltyramine | MMP2     |
| N-Trans-Feruloyltyramine | MMP1     |
| N-Trans-Feruloyltyramine | EGFR     |
| N-Trans-Feruloyltyramine | CNR2     |
| N-Trans-Feruloyltyramine | MAOB     |
| N-Trans-Feruloyltyramine | TYR      |
| N-Trans-Feruloyltyramine | BRAF     |
| N-Trans-Feruloyltyramine | CDK1     |
| N-Trans-Feruloyltyramine | PTGS2    |
| N-Trans-Feruloyltyramine | ALOX5    |
| N-Trans-Feruloyltyramine | SYK      |
| N-Trans-Feruloyltyramine | CHEK1    |
| N-Trans-Feruloyltyramine | WEE1     |
| N-Trans-Feruloyltyramine | CTSL     |
| N-Trans-Feruloyltyramine | MTNR1A   |
| N-Trans-Feruloyltyramine | HSP90AA1 |
| N-Trans-Feruloyltyramine | BCHE     |
| N-Trans-Feruloyltyramine | ACHE     |

|                          |         |
|--------------------------|---------|
| N-Trans-Feruloyltyramine | GLI2    |
| N-Trans-Feruloyltyramine | ABL1    |
| N-Trans-Feruloyltyramine | CDK5R1  |
| N-Trans-Feruloyltyramine | ALDH2   |
| N-Trans-Feruloyltyramine | MTOR    |
| N-Trans-Feruloyltyramine | PDK1    |
| N-Trans-Feruloyltyramine | DNM1    |
| N-Trans-Feruloyltyramine | ESRRA   |
| N-Trans-Feruloyltyramine | ESRRB   |
| N-Trans-Feruloyltyramine | THRA    |
| N-Trans-Feruloyltyramine | THRB    |
| N-Trans-Feruloyltyramine | PRKCZ   |
| N-Trans-Feruloyltyramine | RPS6KB1 |
| N-Trans-Feruloyltyramine | CHEK2   |
| N-Trans-Feruloyltyramine | BMP1    |
| N-Trans-Feruloyltyramine | MMP3    |
| N-Trans-Feruloyltyramine | DUSP3   |
| N-Trans-Feruloyltyramine | MMP8    |
| N-Trans-Feruloyltyramine | CA7     |
| N-Trans-Feruloyltyramine | CA6     |
| N-Trans-Feruloyltyramine | CA12    |
| N-Trans-Feruloyltyramine | CA14    |
| N-Trans-Feruloyltyramine | CA9     |
| N-Trans-Feruloyltyramine | CA5A    |
| N-Trans-Feruloyltyramine | ROCK2   |
| N-Trans-Feruloyltyramine | HPGDS   |
| N-Trans-Feruloyltyramine | DRD2    |
| N-Trans-Feruloyltyramine | DRD3    |
| N-Trans-Feruloyltyramine | HSD17B2 |
| N-Trans-Feruloyltyramine | HSD17B1 |
| N-Trans-Feruloyltyramine | ADORA1  |
| N-Trans-Feruloyltyramine | ADORA2A |
| N-Trans-Feruloyltyramine | PDE4D   |
| N-Trans-Feruloyltyramine | PDE4C   |
| N-Trans-Feruloyltyramine | HDAC1   |
| N-Trans-Feruloyltyramine | CDK1    |
| N-Trans-Feruloyltyramine | CCNE1   |
| N-Trans-Feruloyltyramine | CCNE1   |
| N-Trans-Feruloyltyramine | ADAM17  |
| N-Trans-Feruloyltyramine | GRK2    |
| N-Trans-Feruloyltyramine | SLC5A1  |
| N-Trans-Feruloyltyramine | MMP13   |
| N-Trans-Feruloyltyramine | MMP7    |
| N-Trans-Feruloyltyramine | TRPM8   |
| N-Trans-Feruloyltyramine | ALK     |
| N-Trans-Feruloyltyramine | INSR    |
| N-Trans-Feruloyltyramine | CFD     |

|                          |          |
|--------------------------|----------|
| N-Trans-Feruloyltyramine | TNF      |
| N-Trans-Feruloyltyramine | TOP1     |
| N-Trans-Feruloyltyramine | AGTR1    |
| N-Trans-Feruloyltyramine | ANPEP    |
| N-Trans-Feruloyltyramine | MMP14    |
| N-Trans-Feruloyltyramine | PNMT     |
| N-Trans-Feruloyltyramine | CDK4     |
| N-Trans-Feruloyltyramine | PTPN1    |
| N-Trans-Feruloyltyramine | TRAP1    |
| N-Trans-Feruloyltyramine | HSP90B1  |
| N-Trans-Feruloyltyramine | HTR3A    |
| N-Trans-Feruloyltyramine | HSP90AB1 |
| N-Trans-Feruloyltyramine | VCP      |
| N-Trans-Feruloyltyramine | AVPR1A   |
| N-Trans-Feruloyltyramine | NR1H4    |
| N-Trans-Feruloyltyramine | ADORA3   |
| N-Trans-Feruloyltyramine | ADAM10   |
| N-Trans-Feruloyltyramine | TSPO     |
| N-Trans-Feruloyltyramine | CA13     |
| N-Trans-Feruloyltyramine | CA5B     |
| N-Trans-Feruloyltyramine | TYMS     |
| N-Trans-Feruloyltyramine | MIF      |
| N-Trans-Feruloyltyramine | PDE7A    |
| N-Trans-Feruloyltyramine | EPHA2    |
| N-Trans-Feruloyltyramine | MMP16    |
| N-Trans-Feruloyltyramine | AKT2     |
| N-Trans-Feruloyltyramine | EPHB2    |
| N-Trans-Feruloyltyramine | MAP2K1   |
| N-Trans-Feruloyltyramine | EPHA5    |
| N-Trans-Feruloyltyramine | EPHA4    |
| N-Trans-Feruloyltyramine | EPHA8    |
| N-Trans-Feruloyltyramine | MMP12    |
| N-Trans-Feruloyltyramine | EPHA7    |
| N-Trans-Feruloyltyramine | EPHB3    |
| N-Trans-Feruloyltyramine | CDK5     |
| N-Trans-Feruloyltyramine | CCNB1    |
| N-Trans-Feruloyltyramine | CDK2     |
| N-Trans-Feruloyltyramine | CDK3     |
