# Supplementary material for: The Neuroprotective Effect of Shenmai Injection on Oxidative Stress Injury in PC12 Cells Based on Network Pharmacology
Source: Evid Based Complement Alternat Med. 2022 May 27;2022:6969740. doi: 10.1155/2022/6969740 (PMC9166949; doi:10.1155/2022/6969740)
Supplement: Supplementary Materials — Table S1: drug targets information. Table S2: disease targets information. Table S3: intersection of drug and disease targets. [file 6969740.f1.zip]

Archive with 3 entries (3 files):
- 6969740.f1/Supplementary Table S1.pdf
- 6969740.f1/Supplementary Table S2.pdf
- 6969740.f1/Supplementary Table S3.pdf
